# Supplementary material for: The association between the ERCC1/2 polymorphisms and radiotherapy efficacy in 87 patients with non-small cell lung cancer
Source: PubMed Central journal article supplement — J Thorac Dis. 2021 May;13(5):3126–36. doi: 10.21037/jtd-21-755 (PMC8182509; doi:10.21037/jtd-21-755), 2021-05
Supplement: jtd-13-05-3126-dss.pdf [file jtd-13-05-3126-dss.pdf]

## Data Sharing Statement

|                     |                                                                                                                                                     |                                                                                                                                     |
|---------------------|-----------------------------------------------------------------------------------------------------------------------------------------------------|-------------------------------------------------------------------------------------------------------------------------------------|
| <b>Article Info</b> | <a href="http://dx.doi.org/10.21037/jtd-21-755">http://dx.doi.org/10.21037/jtd-21-755</a>                                                           |                                                                                                                                     |
| <b>Item</b>         | <b>Question</b>                                                                                                                                     | <b>Authors' Response<br/>(place "-" if not applicable)</b>                                                                          |
| 1                   | Would you like to share data collected for your study to others?                                                                                    | Yes.                                                                                                                                |
| 2                   | If not, would you like to share the reason for your decision?                                                                                       | -                                                                                                                                   |
| 3                   | What data in particular will be shared?                                                                                                             | The Genotyping information and the survival data in our study.                                                                      |
| 4                   | Any other documents will be shared? Such as study protocol, statistical analysis plan, informed consent form, clinical study report, analytic code. | Statistical analysis plan will also be shared if requested.                                                                         |
| 5                   | When will data availability begin?                                                                                                                  | From the publication date.                                                                                                          |
| 6                   | When will data availability end?                                                                                                                    | Two years within the publication date, since the technique or survival date may be updated over time.                               |
| 7                   | To whom will you share the data?                                                                                                                    | Oncologist who interested in studies of SNPs.                                                                                       |
| 8                   | For what type of analysis or purpose?                                                                                                               | For analysis to evaluate the association between the efficacy of radiotherapy and SNPs in patients with non-small cell lung cancer. |
| 9                   | How or where can the data/documents be obtained?                                                                                                    | Emails could be sent to the address below to obtain the shared data:<br>xuyaping1207@163.com                                        |
| 10                  | Any other restrictions?                                                                                                                             | We may balance the potential benefits and risks for each request and then provide the data that could be shared.                    |
