# Supplementary material for: The association between the ERCC1/2 polymorphisms and radiotherapy efficacy in 87 patients with non-small cell lung cancer
Source: PubMed Central journal article supplement — J Thorac Dis. 2021 May;13(5):3126–36. doi: 10.21037/jtd-21-755 (PMC8182509; doi:10.21037/jtd-21-755), 2021-05
Supplement: jtd-13-05-3126-supplementary.pdf [file jtd-13-05-3126-supplementary.pdf]

**Table S1** Primer information of the ERCC1/2 gene of SNPs

| Gene             | Strand     | Primer information                |
|------------------|------------|-----------------------------------|
| ERCC1            |            |                                   |
| <i>rs11615</i>   | Upstream   | <i>TCGGGAATTACGTCGCCAAATT</i>     |
|                  | Downstream | <i>GTCCAGGGTTAGGAGGAGAGAGAAG</i>  |
| <i>rs3212961</i> | Upstream   | <i>CATGTCATCTCAGATGTGAAAAACGT</i> |
|                  | Downstream | <i>TGAAGAGACTGAGACCTCTCAACTC</i>  |
| <i>rs3212986</i> | Upstream   | <i>GACTGAGCCAATTCAGCCACTA</i>     |
|                  | Downstream | <i>GCACCTTCAGCTTCTTTAGTTCCT</i>   |
| ERCC2            |            |                                   |
| <i>rs13181</i>   | Upstream   | <i>GGAGTCACCAGGAACCGTTTAT</i>     |
|                  | Downstream | <i>GCTCTGGATTATACGGACATCTCCA</i>  |
| <i>rs238406</i>  | Upstream   | <i>GGGCATCAAATTCCTGGGACAA</i>     |
|                  | Downstream | <i>TTGAAGAGTGGTTGGGTTTCCA</i>     |
| <i>rs1799793</i> | Upstream   | <i>CTCAGGAAGCCCAGGAAATGCT</i>     |
|                  | Downstream | <i>CTCATCTCTCCGCAGGATCAAAG</i>    |

**Table S2** ERCC1/2 SNPs of 87 patients with NSCLC in the CR + PR group and the SD + PD group

| Factor           | OR (N=44) | Non-OR (N=43) | P     |
|------------------|-----------|---------------|-------|
| <i>rs11615</i>   |           |               |       |
| AA               | 0         | 4             | 0.130 |
| AG               | 14        | 14            |       |
| GG               | 30        | 25            |       |
| A allele         | 14        | 18            | 0.331 |
| G allele         | 30        | 25            |       |
| <i>rs3212961</i> |           |               |       |
| GG               | 8         | 14            | 0.194 |
| GT               | 22        | 21            |       |
| TT               | 14        | 8             |       |
| G allele         | 8         | 14            | 0.123 |
| T allele         | 36        | 29            |       |
| <i>rs3212986</i> |           |               |       |
| CC               | 21        | 22            | 0.806 |
| CA               | 20        | 17            |       |
| AA               | 3         | 4             |       |
| C allele         | 21        | 22            | 0.749 |
| A allele         | 23        | 21            |       |
| <i>rs13181</i>   |           |               |       |
| TT               | 39        | 36            | 0.549 |
| TG               | 5         | 7             |       |
| GG               | 0         | 0             |       |
| T allele         | 39        | 36            | 0.549 |
| G allele         | 5         | 7             |       |
| <i>rs238406</i>  |           |               |       |
| TT               | 10        | 12            | 0.790 |
| TG               | 22        | 19            |       |
| GG               | 12        | 12            |       |
| T allele         | 32        | 31            | 0.947 |
| G allele         | 12        | 12            |       |
| <i>rs1799793</i> |           |               |       |
| CC               | 39        | 39            | 0.668 |
| CT               | 5         | 4             |       |
| TT               | 0         | 0             |       |
| C allele         | 39        | 39            | 1.000 |
| T allele         | 5         | 4             |       |

CR, complete response; PR, partial response; SD stable disease; PD, progressive disease
